# Supplementary material for: The characteristics of cloud macro parameters caused by seeder-feeder inside clouds measured by millimeter-wave cloud radar in Xi'an
Source: Copernicus journal article supplement (doi:10.5194/egusphere-2023-2183), 2023-11-16
Supplement: Supplementary file [file egusphere-2023-2183-RC1-supplement.pdf]

Based on the observed results of microwave radar, this paper analyzed the seeding process of the upper layer in stable stratus cloud to the lower layer cloud. Specifically, by defining the relevant parameters of the seeding process, the characteristics of these parameters in the seeding process were obtained, such as the seeding depth and the seeding action time. The significance of this paper is to reveal the cloud interaction in vertical direction from the observed results of microwave radar.

The process from cloud to rain is very complex, the upper cloud affected the lower, and produced precipitation, have been widely attention, such as cold cloud precipitation process that involves the upper ice particles falling action on the lower cloud. To this end, the following recommendations are made:

1. Is the method described in the article appropriate for unstable cloud systems?
2. In the article, only one microwave radar was used. If the two radars placed along the direction of cloud movement, is it better for your result?
3. It is very nice for this article that obtained the useful characteristics of seeding process, such as the differences of seeding depth and the seeding action time for the three different seeding processes. My suggestion is that in the follow-up studies by large sample statistics, possibly more specific differences between different seeding types will be obtained.
